# Supplementary material for: Expression and Characterisation of the First Snail-Derived UDP-Gal: Glycoprotein-N-acetylgalactosamine β-1,3-Galactosyltransferase (T-Synthase) from Biomphalaria glabrata
Source: MDPI journal article supplement (doi:10.3390/molecules28020552), 2023-01-05
Supplement: s1 [file s1]

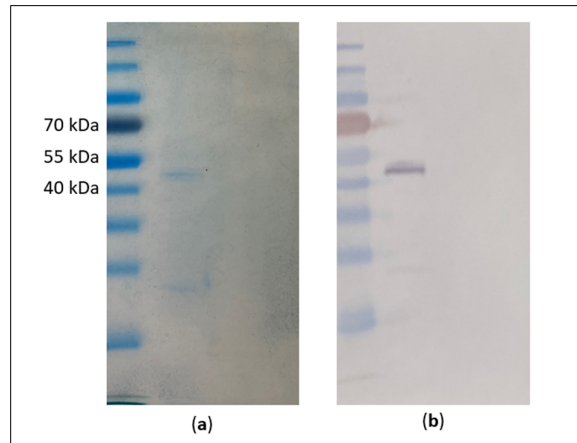

**Figure S1.** Expression of the recombinant protein (a) Coomassie staining; (b) Immunoblotting with Penta-His tag monoclonal antibody.

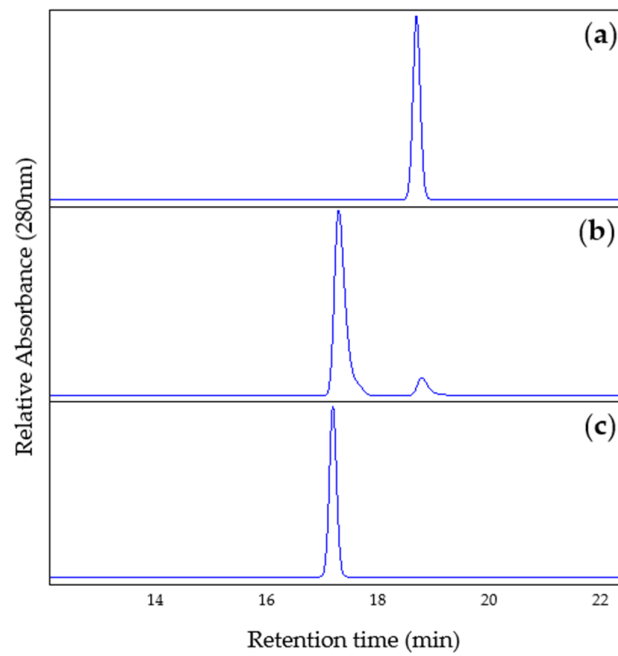

**Figure S2.** HPLC analysis of the transfer of Gal to pNP- $\alpha$ -GalNAc. (a) Standard pNP- $\alpha$ -GalNAc; (b) incubation for 2 hours; (c) Standard pNP- $\alpha$ -GalNAc- $\beta$ -Gal.

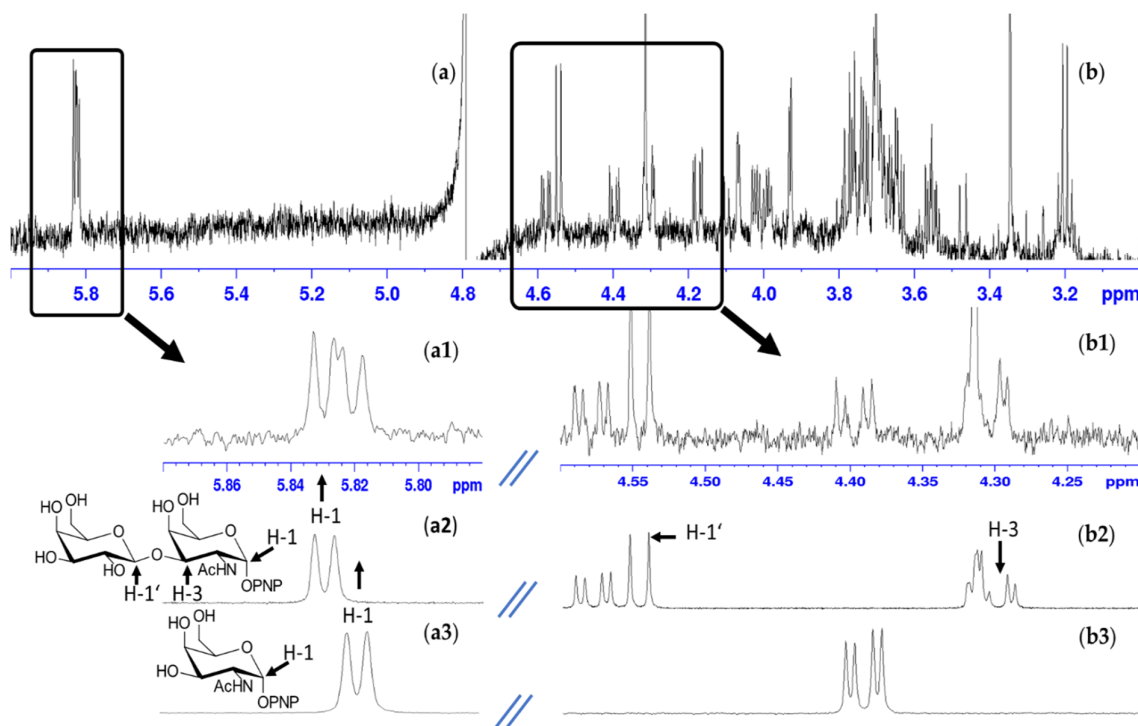

**Figure S3.**  $^1\text{H}$  NMR of the incubation assay compared to  $^1\text{H}$  NMR spectra of pNP-GalNAc and Gal- $\beta$ -(1 $\rightarrow$ 3)GalNAc- $\alpha$ -pNP. (a1) Expanded anomeric region around 5.8 ppm shows a mixture of pNP-GalNAc (a3) and Gal- $\beta$ -(1 $\rightarrow$ 3)GalNAc- $\alpha$ -pNP (a2); (b1) The core region between 4.6 and 4.2 ppm shows the presence of the  $\beta$  configured position 1 of Gal and glycosylated position 3 of pNP-GalNAc (b2); (a2) and (b2) show expanded  $^1\text{H}$  NMR view of commercial available Gal- $\beta$ -(1 $\rightarrow$ 3)GalNAc- $\alpha$ -pNP reference; (a3) and (b3) show expanded  $^1\text{H}$  NMR view of commercial available pNP-GalNAc reference.
